# Supplementary material for: Bio-inspired catechol conjugation converts water-insoluble chitosan into a highly water-soluble, adhesive chitosan derivative for hydrogels and LbL assembly
Source: Royal Society of Chemistry journal article supplement (doi:10.1039/c3bm00004d), 2013-01-01
Supplement: c3bm00004d.pdf [file c3bm00004d.pdf]

# Bio-inspired Catechol Conjugation Converts Water-insoluble Chitosan into Highly Water-Soluble, Adhesive Chitosan Derivative for Hydrogels and LbL Assembly

Kyuri Kim,<sup>\*a</sup> Ji Hyun Ryu,<sup>\*a</sup> Dong Yun Lee<sup>d</sup> and Haeshin Lee<sup>a,b,c</sup>

<sup>a</sup> Graduate School of Nanoscience and Technology (WCU), Korea Advanced Institute of Science and Technology (KAIST), 291 University Rd., Daejeon 305-701, Republic of Korea. Fax: +82 42-350-2810; Tel: +82 42-350-2849; E-mail: haeshin@kaist.ac.kr

<sup>b</sup> Department of Chemistry, Korea Advanced Institute of Science and Technology (KAIST), 291 University Rd., Daejeon 305-701, Republic of Korea.

<sup>c</sup> Molecular-Level Interface Research Center, Korea Advanced Institute of Science and Technology (KAIST), 291 University Rd., Daejeon 305-701, Republic of Korea

<sup>d</sup> Department of Bioengineering, Hanyang University, 17 Haengdang-dong, Seongdong-gu, Seoul, 133-791, Republic of Korea

<sup>\*</sup>These authors contributed equally to this work

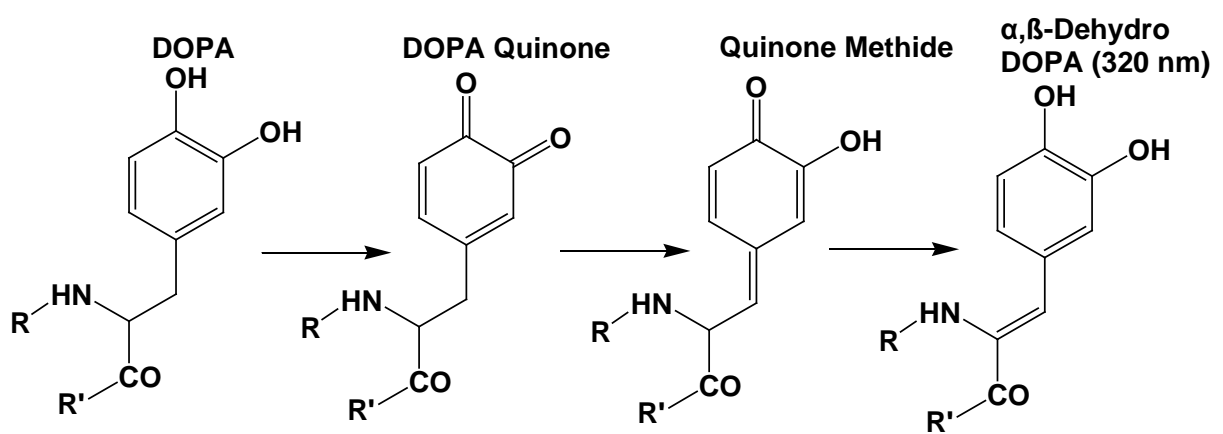

**Figure S1** The structure of α,β -dehydro DOPA, which has UV absorption at 320 nm.
